# Supplementary material
Source: MDPI journal article supplement (https://www.mdpi.com/2073-4395/12/6/1472)
Supplement: s1 [file s1]

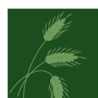

## Appendix

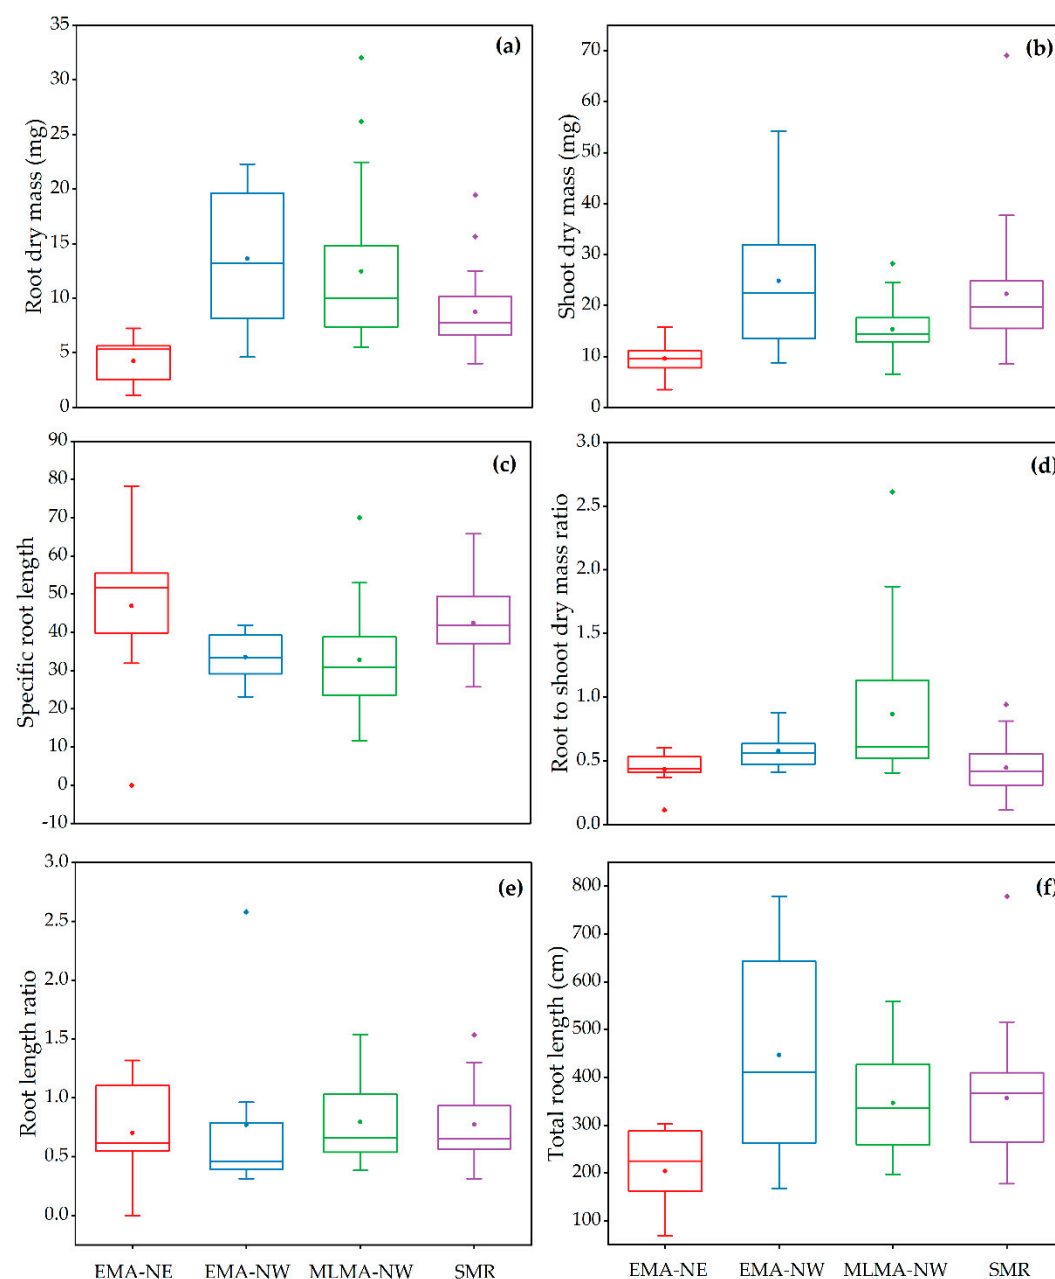

**Figure S1.** Variations of root and shoot phenotypes among the 4 ecological regions: (a) root dry mass; (b) shoot dry mass; (c) specific root length; (d) shoot to shoot dry mass ratio; (e) root length ratio; (f) total root length.

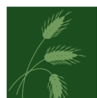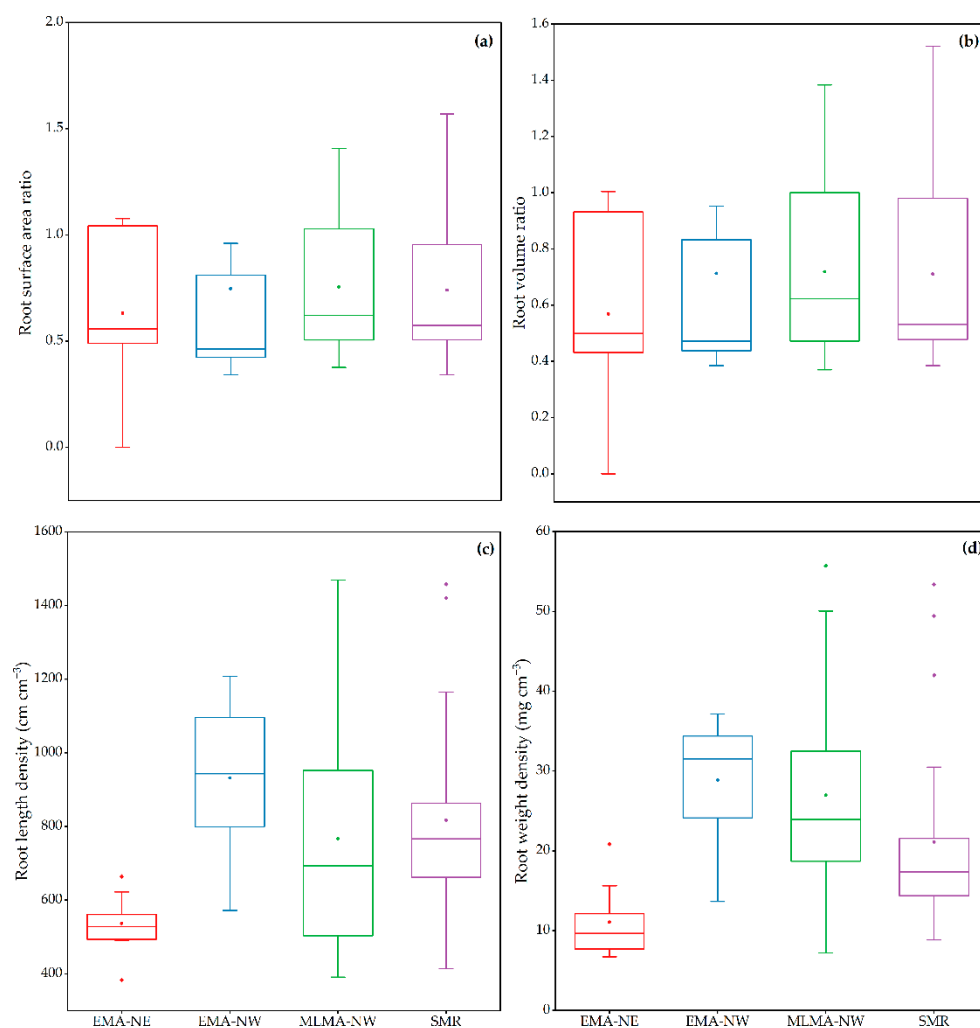

**Figure S2.** Variations of root phenotypic among the 4 ecological regions: (a) root surface area ratio; (b) root volume ratio; (c) root length density; (d) root weight density.

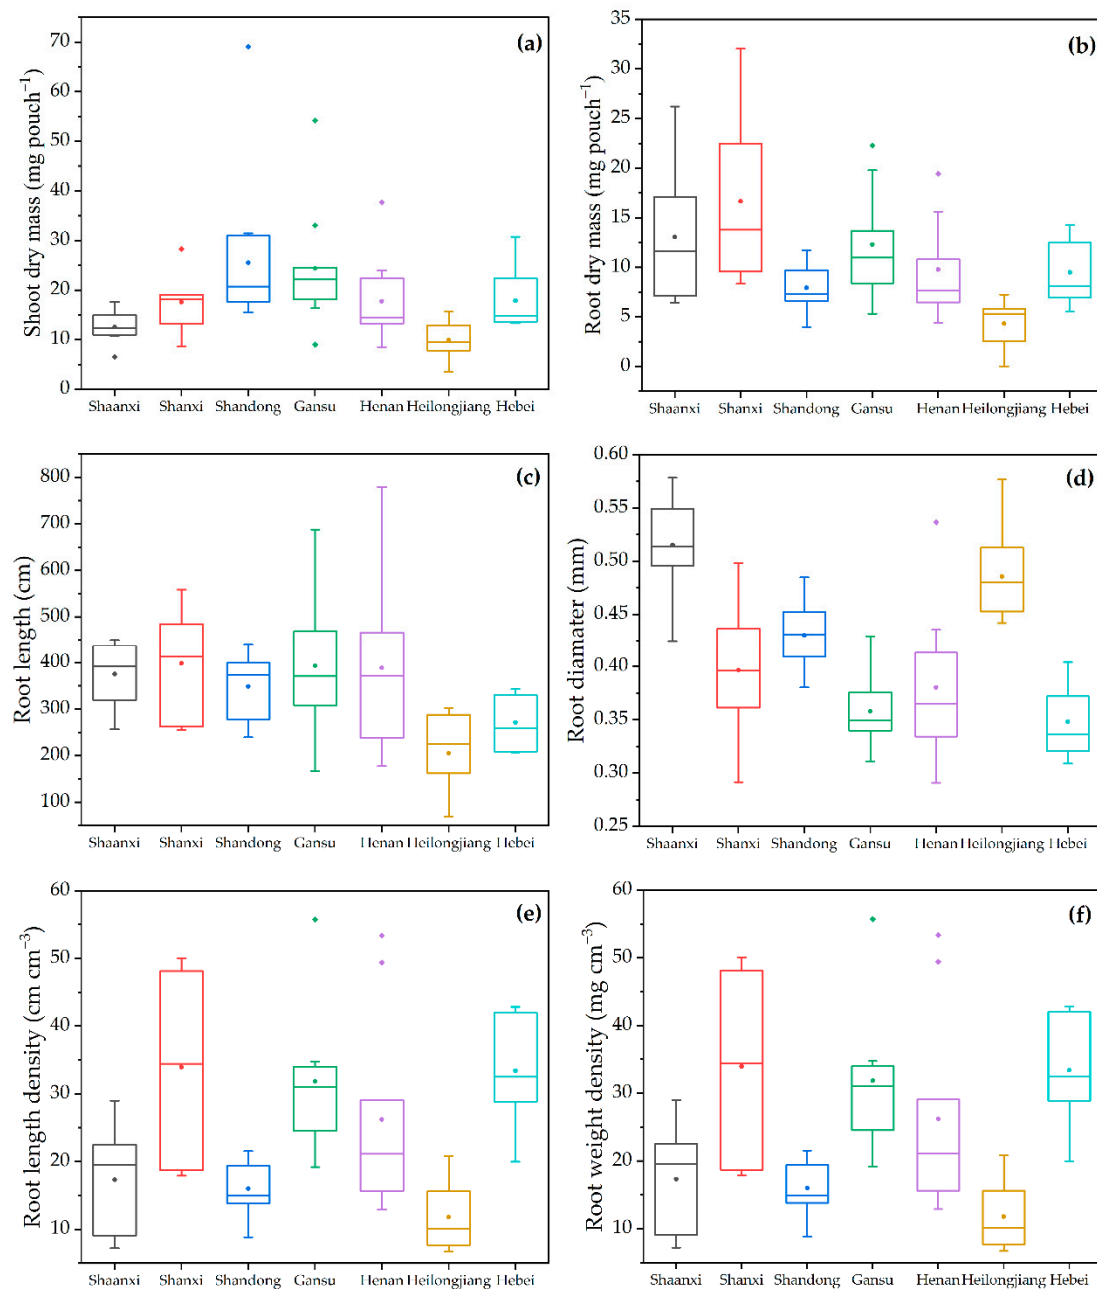

**Figure S3.** Variations of root and shoot phenotypes traits in the 7 provinces: (a) shoot dry mass; (b) root dry mass; (c) root length; (d) root diameter; (e) root length density; (f) root weight density.

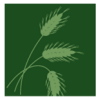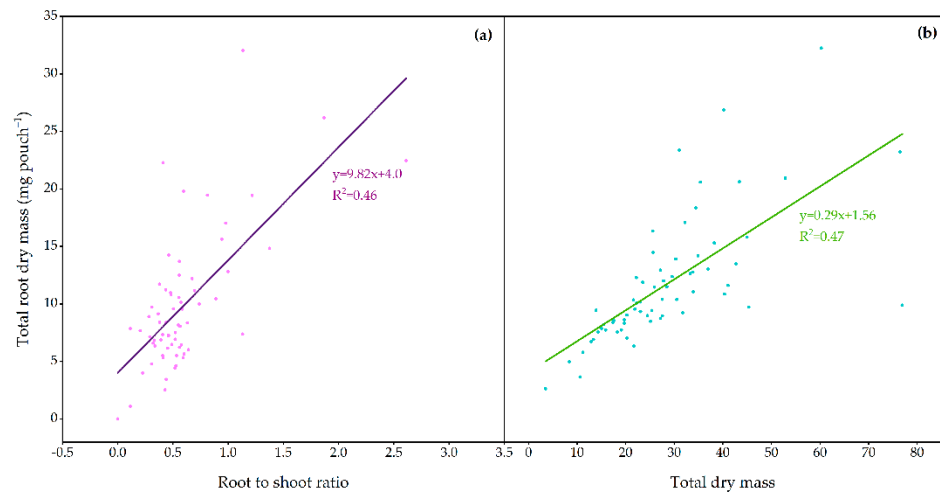

**Figure S4.** Linear fitting of root phenotypes: **(a)** total root dry mass vs. root to shoot ratio; **(b)** root dry mass vs. total dry mass.

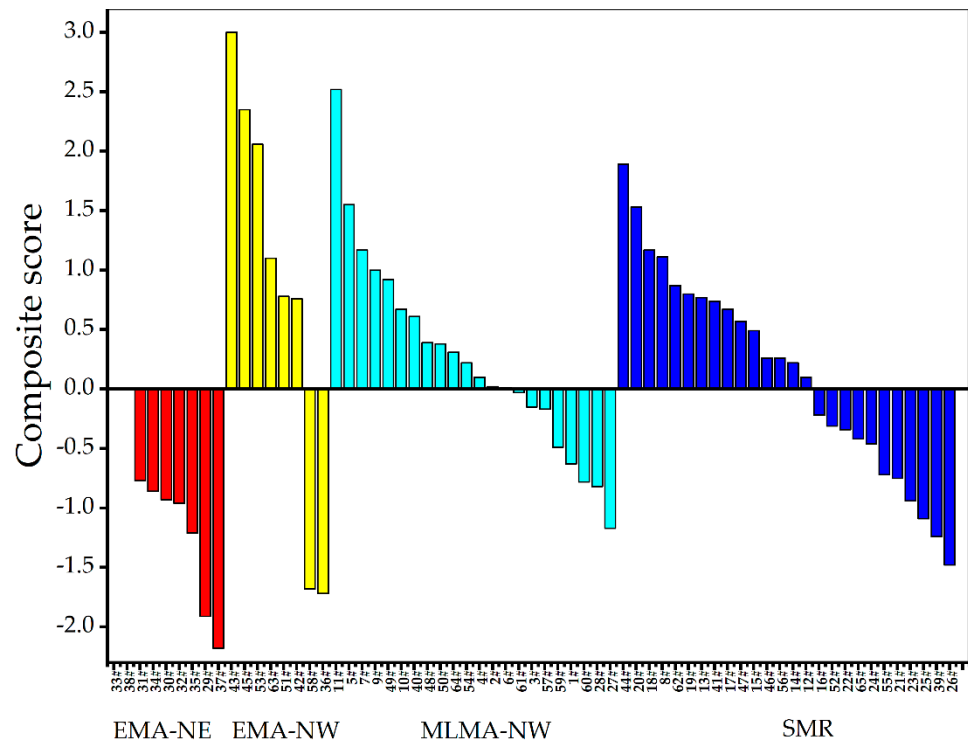

**Figure S5.** Comprehensive values of 18 selected traits. Composite score sorted from small to large, divided by ecological regions.

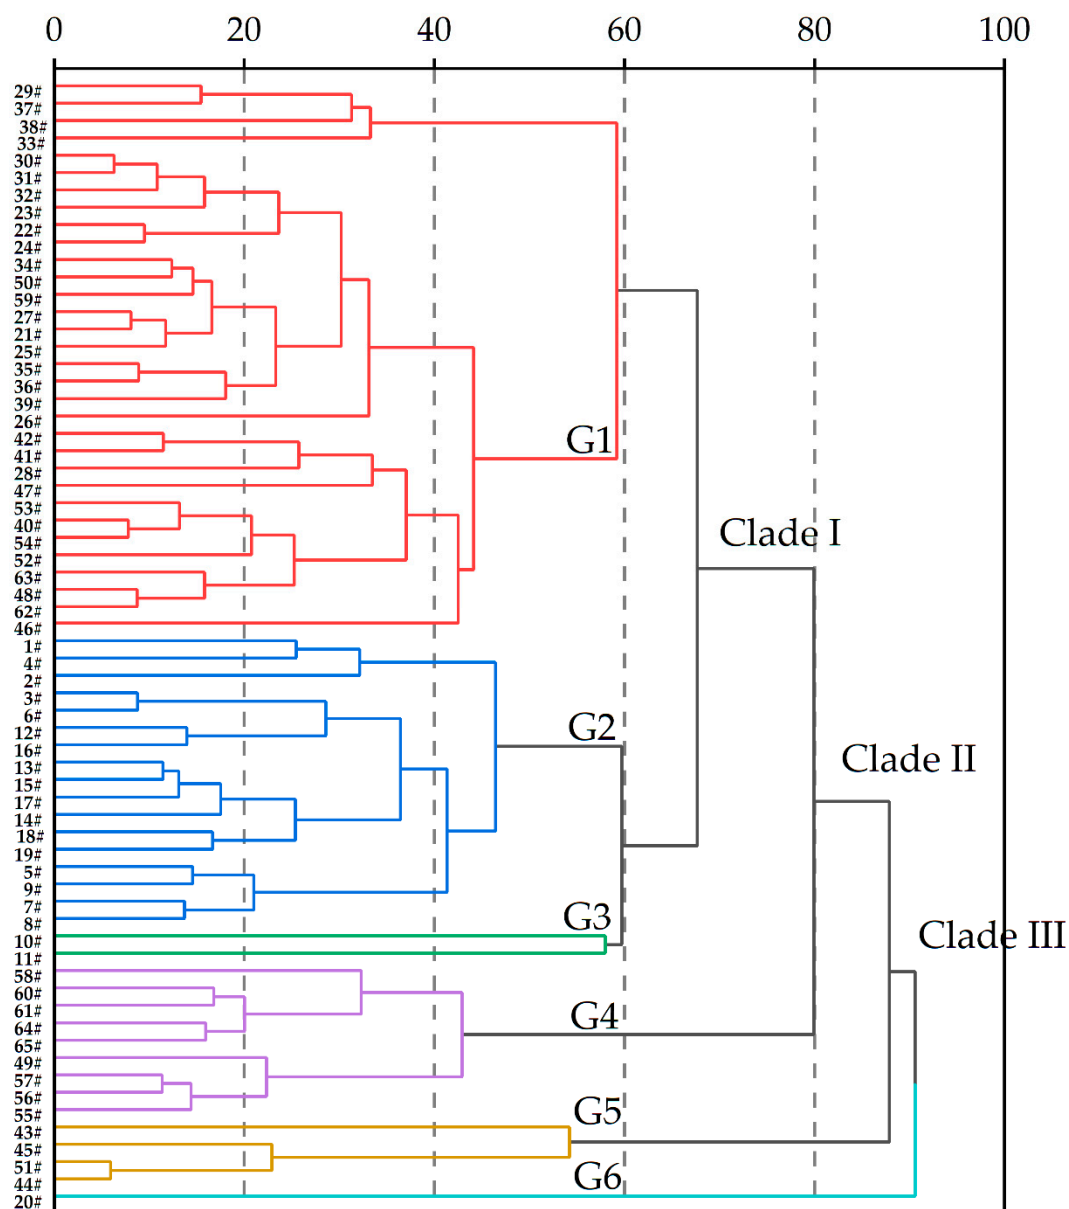

**Figure S6.** Dendrogram of agglomerative hierarchical clustering (AHC) on 18 selected root traits. The 65 millet genotypes were assigned to one of three general clades (Clade I, Clade II and Clade III) at a rescaled distance of 80 containing six groups (G1 to G6) at a rescaled distance 60.

**Table S1.** Cultivar, origin, seed provider, ecological region of 65 millet genotypes

17

| No | Cultivar                      | Origin       | Seed provider    | Ecological region                           |
|----|-------------------------------|--------------|------------------|---------------------------------------------|
| 1  | 2019 Drought resistance of 8  | Shaanxi      | Yulin AAS        | Mid-late maturing region in Northwest China |
| 2  | Yulin drought resistance of 1 | Shaanxi      | Yulin AAS        | Mid-late maturing region in Northwest China |
| 3  | Yulin drought resistance of 2 | Shaanxi      | Yulin AAS        | Mid-late maturing region in Northwest China |
| 4  | 2019 Drought resistance of 2  | Shaanxi      | Yulin AAS        | Mid-late maturing region in Northwest China |
| 5  | 2019 Drought resistance of 4  | Shaanxi      | Yulin AAS        | Mid-late maturing region in Northwest China |
| 6  | 2019 Drought resistance of 5  | Shaanxi      | Yulin AAS        | Mid-late maturing region in Northwest China |
| 7  | JinGu 21                      | Shanxi       | Yulin AAS        | Mid-late maturing region in Northwest China |
| 8  | YuGu 1                        | Shaanxi      | Yulin AAS        | Summer maturing region                      |
| 9  | Yulin Gu 1                    | Shaanxi      | Yulin AAS        | Mid-late maturing region in Northwest China |
| 10 | ChangSheng 7                  | Shanxi       | Yulin AAS        | Mid-late maturing region in Northwest China |
| 11 | Nong 2019                     | Shanxi       | Yulin AAS        | Mid-late maturing region in Northwest China |
| 12 | JiGu 14                       | Shandong     | Shandong AAS     | Summer maturing region                      |
| 13 | JiGu 15                       | Shandong     | Shandong AAS     | Summer maturing region                      |
| 14 | JiGu 16                       | Shandong     | Shandong AAS     | Summer maturing region                      |
| 15 | JiGu 17                       | Shandong     | Shandong AAS     | Summer maturing region                      |
| 16 | JiGu 18                       | Shandong     | Shandong AAS     | Summer maturing region                      |
| 17 | JiGu 19                       | Shandong     | Shandong AAS     | Summer maturing region                      |
| 18 | JiGu 20                       | Shandong     | Shandong AAS     | Summer maturing region                      |
| 19 | JiGu 21                       | Shandong     | Shandong AAS     | Summer maturing region                      |
| 20 | JiGu 22                       | Shandong     | Shandong AAS     | Summer maturing region                      |
| 21 | JiGu 23                       | Shandong     | Shandong AAS     | Summer maturing region                      |
| 22 | JiGu 24                       | Shandong     | Shandong AAS     | Summer maturing region                      |
| 23 | JiGu 25                       | Shandong     | Shandong AAS     | Summer maturing region                      |
| 24 | JiGu 26                       | Shandong     | Shandong AAS     | Summer maturing region                      |
| 25 | JiGu 27                       | Shandong     | Shandong AAS     | Summer maturing region                      |
| 26 | JiGu 28                       | Shandong     | Shandong AAS     | Summer maturing region                      |
| 27 | Qitoubai                      | Heilongjiang | Heilongjiang AAS | Mid-late maturing region in Northwest China |
| 28 | QinGu 5                       | Shaanxi      | Yulin AAS        | Mid-late maturing region in Northwest China |

|    |            |              |                  |                                             |
|----|------------|--------------|------------------|---------------------------------------------|
| 29 | LongGu 23  | Heilongjiang | Heilongjiang AAS | Early maturing area of Northeast China      |
| 30 | LongGu 25  | Heilongjiang | Heilongjiang AAS | Early maturing area of Northeast China      |
| 31 | LongGu 44  | Heilongjiang | Heilongjiang AAS | Early maturing area of Northeast China      |
| 32 | LongGu 31  | Heilongjiang | Heilongjiang AAS | Early maturing area of Northeast China      |
| 33 | LongGu 39  | Heilongjiang | Heilongjiang AAS | Early maturing area of Northeast China      |
| 34 | ShengGu 1  | Heilongjiang | Heilongjiang AAS | Early maturing area of Northeast China      |
| 35 | LongGu 38  | Heilongjiang | Heilongjiang AAS | Early maturing area of Northeast China      |
| 36 | NenXuan 15 | Heilongjiang | Heilongjiang AAS | Early maturing area of Northwest China      |
| 37 | LongGu 37  | Heilongjiang | Heilongjiang AAS | Early maturing area of Northeast China      |
| 38 | LongGu 26  | Heilongjiang | Heilongjiang AAS | Early maturing area of Northeast China      |
| 39 | YuGu 14    | Henan        | Anyang AAS       | Summer maturing region                      |
| 40 | JinGu 29   | Shanxi       | Shanxi AAS       | Mid-late maturing region in Northwest China |
| 41 | YuGu 5     | Henan        | Anyang AAS       | Summer maturing region                      |
| 42 | LongGu 7   | Gansu        | Gansu AAS        | Early maturing area of Northwest China      |
| 43 | LongGu 4   | Gansu        | Gansu AAS        | Early maturing area of Northwest China      |
| 44 | YuGu 11    | Henan        | Anyang AAS       | Summer maturing region                      |
| 45 | LongGu 5   | Gansu        | GansuAAS         | Early maturing area of Northwest China      |
| 46 | YuGu 31    | Henan        | Anyang AAS       | Summer maturing region                      |
| 47 | YuGu 9     | Henan        | Anyang AAS       | Summer maturing region                      |
| 48 | JinGu 40   | Shanxi       | Shanxi AAS       | Mid-late maturing region in Northwest China |
| 49 | YuGu 6     | Gansu        | Gansu AAS        | Mid-late maturing region in Northwest China |
| 50 | LongGu 3   | Gansu        | Gansu AAS        | Mid-late maturing region in Northwest China |
| 51 | LongGu 8   | Gansu        | Gansu AAS        | Early maturing area of Northwest China      |
| 52 | YuGu 32    | Henan        | Anyang AAS       | Summer maturing region                      |

|    |              |        |            |                                                |
|----|--------------|--------|------------|------------------------------------------------|
| 53 | LongGu 9     | Gansu  | Gansu AAS  | Early maturing area of<br>Northwest China      |
| 54 | ChangNong 35 | Shanxi | Shanxi AAS | Mid-late maturing region in<br>Northwest China |
| 55 | YuGu 2       | Henan  | Anyang AAS | Summer maturing region                         |
| 56 | YuGu 7       | Henan  | Anyang AAS | Summer maturing region                         |
| 57 | LongGu 11    | Gansu  | Gansu AAS  | Mid-late maturing region in<br>Northwest China |
| 58 | LongGu 10    | Gansu  | Gansu AAS  | Early maturing area of<br>Northwest China      |
| 59 | HuangQi      | Hebei  | Hebei AAS  | Mid-late maturing region in<br>Northwest China |
| 60 | JiGu 42      | Hebei  | Hebei AAS  | Mid-late maturing region in<br>Northwest China |
| 61 | JiGu 22      | Hebei  | Hebei AAS  | Mid-late maturing region in<br>Northwest China |
| 62 | JiChuang 1   | Hebei  | Hebei AAS  | Summer maturing region                         |
| 63 | JiZhangGu 2  | Hebei  | Hebei AAS  | Early maturing area of<br>Northwest China      |
| 64 | Cheng 11-727 | Hebei  | Hebei AAS  | Mid-late maturing region in<br>Northwest China |
| 65 | Bao 008      | Hebei  | Hebei AAS  | Summer maturing region                         |

*Note:* The abbreviation of four ecological regions: Early maturing area of Northeast China (EMA-NE), Early maturing area of Northwest China (EMA-NW), Mid-late maturing region in Northwest China (MLMA-NW), Summer maturing region (SMR).

18

19

20

21



**Table S2.** Pearson's correlation matrix for 18 selected traits of 65 millet genotypes

| Traits | MRL     | RN      | SDM     | RDM     | RL      | RA      | RV      | RD       | RLD      | RWD      | SRL      | RSM     | RGR      | TDM     | RLR      | RSAR     | RVR      |
|--------|---------|---------|---------|---------|---------|---------|---------|----------|----------|----------|----------|---------|----------|---------|----------|----------|----------|
| LN     | 0.535** | 0.511** | 0.414** | 0.385** | 0.465** | 0.200   | -0.033  | -0.640** | 0.613**  | 0.537**  | -0.382** | -0.053  | -0.127   | 0.482** | -0.219   | -0.168   | -0.110   |
| MRL    |         | 0.881** | 0.665** | 0.594** | 0.678** | 0.562** | 0.376** | -0.315*  | 0.274*   | 0.365**  | -0.328** | 0.110   | 0.487**  | 0.765** | -0.595** | -0.578** | -0.549** |
| RN     |         |         | 0.495** | 0.720** | 0.710** | 0.628** | 0.471** | -0.226   | 0.187    | 0.360**  | -0.288*  | 0.295*  | 0.433**  | 0.687** | -0.624** | -0.613** | -0.583** |
| SDM    |         |         |         | 0.344** | 0.495** | 0.364** | 0.181   | -0.221   | 0.153    | 0.116    | -0.177   | -0.268* | 0.303*   | 0.918** | -0.347** | -0.340** | -0.322*  |
| RDM    |         |         |         |         | 0.669** | 0.644** | 0.532** | -0.041   | 0.019    | 0.455**  | -0.212   | 0.667** | 0.489**  | 0.689** | -0.356** | -0.343** | -0.323** |
| RL     |         |         |         |         |         | 0.901** | 0.687** | -0.018   | 0.047    | 0.021    | -0.257*  | 0.217   | 0.402**  | 0.665** | -0.650** | -0.663** | -0.653** |
| RA     |         |         |         |         |         |         | 0.932** | 0.362**  | -0.331** | -0.212   | -0.228   | 0.340** | 0.621**  | 0.554** | -0.590** | -0.644** | -0.683** |
| RV     |         |         |         |         |         |         |         | 0.612**  | -0.570** | -0.352** | -0.164   | 0.408** | 0.698**  | 0.364** | -0.450** | -0.525** | -0.594** |
| RD     |         |         |         |         |         |         |         |          | -0.928** | -0.737** | 0.267*   | 0.165   | 0.389**  | -0.188  | 0.006    | -0.101   | -0.219   |
| RLD    |         |         |         |         |         |         |         |          |          | 0.758**  | -0.184   | -0.166  | -0.388** | 0.127   | 0.023    | 0.129    | 0.245    |
| RWD    |         |         |         |         |         |         |         |          |          |          | -0.228   | 0.349** | -0.079   | 0.282*  | 0.092    | 0.188    | 0.282*   |
| SRL    |         |         |         |         |         |         |         |          |          |          |          | -0.188  | -0.103   | -0.227  | -0.084   | -0.133   | -0.163   |
| RSM    |         |         |         |         |         |         |         |          |          |          |          |         | 0.363**  | 0.075   | -0.030   | -0.030   | -0.034   |
| RGR    |         |         |         |         |         |         |         |          |          |          |          |         |          | 0.440** | -0.187   | -0.226   | -0.270*  |
| TDM    |         |         |         |         |         |         |         |          |          |          |          |         |          |         | -0.423** | -0.412** | -0.390** |
| RLR    |         |         |         |         |         |         |         |          |          |          |          |         |          |         |          | 0.980**  | 0.902**  |
| RSAR   |         |         |         |         |         |         |         |          |          |          |          |         |          |         |          |          | 0.969**  |

\*\* , correlation is significant at the 0.01 level (two-tailed); \* , correlation is significant at the 0.05 level (two-tailed).
